# Supplementary material for: Histidine-Rich Defensins from the Solanaceae and Brasicaceae Are Antifungal and Metal Binding Proteins
Source: MDPI journal article supplement (doi:10.3390/jof6030145), 2020-08-24

**Table S1: Primers used for cloning CDS into pPink**

| PRIMER NAME       | SEQUENCE 5' TO 3'                            |
|-------------------|----------------------------------------------|
| <b>ATD90_FWD</b>  | TCTCTCGAGAAAAGAGCTCATTGTGATCACTTCTTGGGAGA    |
| <b>ATD90_REV</b>  | GAGCTCGGTACCTTAATGGTAATCTCCATAGCAGTGACA      |
| <b>ATD212_FWD</b> | TCTCTCGAGAAAAGAGCTAACTGTGATACCTATCTTGGAGAGG  |
| <b>ATD212_REV</b> | GAGCTCGGTACCTTATCTACCGTAGCAGTGACA            |
| <b>CRD26_FWD</b>  | TCTCTCGAGAAAAGAGCTAATGATTGTGATAGATTTCTTGGAGA |
| <b>CRD26_REV</b>  | GAGCTCGGTACCTTAATGACCATAGCAATGACAGTGC        |
| <b>SLD26_FWD</b>  | TCTCTCGAGAAAAGAGCTAAGCATTGTGGAAAGCACTCT      |
| <b>SLD26_REV</b>  | GAGCTCGGTACCTTAGCAGTGGTAATAGCAGTAACA         |

**Table S2. Statistical analysis of HRD structures<sup>a</sup>**

|                                                  | AtD90         | SID26         |
|--------------------------------------------------|---------------|---------------|
| Experimental restraints                          |               |               |
| total no. distance restraints                    | 552           | 419           |
| intraresidue                                     | 165           | 115           |
| sequential                                       | 187           | 143           |
| medium range, $i-j < 5$                          | 67            | 43            |
| long range, $i-j \geq 5$                         | 133           | 118           |
| hydrogen bond restraints                         | 16            | 24            |
| dihedral angle restraints                        |               |               |
| phi                                              | 38            | 33            |
| psi                                              | 33            | 21            |
| chi1                                             | 12            | 13            |
| Deviations from idealized geometry               |               |               |
| bond lengths (Å)                                 | 0.011 ± 0.000 | 0.011 ± 0.00  |
| bond angles (deg)                                | 0.968 ± 0.031 | 1.001 ± 0.041 |
| impropers (deg)                                  | 1.23 ± 0.08   | 1.35 ± 0.15   |
| NOE (Å)                                          | 0.009 ± 0.002 | 0.010 ± 0.001 |
| cDih (deg)                                       | 0.085 ± 0.069 | 0.037 ± 0.049 |
| Mean energies (kcal/mol)                         |               |               |
| overall                                          | -1832 ± 55    | -1514 ± 52    |
| bonds                                            | 21.2 ± 1.8    | 19.8 ± 1.4    |
| angles                                           | 52.2 ± 3.7    | 49.9 ± 4.5    |
| improper                                         | 23.0 ± 2.6    | 24.3 ± 4.6    |
| van Der Waals                                    | -271.7 ± 8.5  | -226.4 ± 9.2  |
| NOE                                              | 0.05 ± 0.02   | 0.05 ± 0.01   |
| cDih                                             | 0.12 ± 0.14   | 0.03 ± 0.05   |
| electrostatic                                    | -1898 ± 55    | -1595 ± 58    |
| Violations                                       |               |               |
| NOE violations exceeding 0.2 Å                   | 0             | 0             |
| Dihedral violations exceeding 2.0 Å              | 0             | 0             |
| Rms deviation from mean structure, Å             |               |               |
| backbone atoms                                   | 1.37 ± 0.35   | 1.49 ± 0.31   |
| all heavy atoms                                  | 2.20 ± 0.35   | 2.55 ± 0.38   |
| Stereochemical quality <sup>b</sup>              |               |               |
| Residues in most favoured Ramachandran region, % | 96.5 ± 2.1    | 94.1 ± 3.8    |
| Ramachandran outliers, %                         | 0.1 ± 0.4     | 0.1 ± 0.5     |
| Unfavourable sidechain rotamers, %               | 0.9 ± 1.1     | 0.4 ± 0.9     |
| Clashscore, all atoms                            | 9.1 ± 3.6     | 5.9 ± 1.8     |
| Overall MolProbity score                         | 1.7 ± 0.2     | 1.7 ± 0.2     |

<sup>a</sup>All statistics are given as mean ± SD.<sup>b</sup>According to MolProbity (Chen et al 2010).

Chen, V.B., et al., *Molprobity: All-Atom Structure Validation for Macromolecular Crystallography*. Acta Crystallographica. Section D, Biological Crystallography, 2010. **66**(Pt 1): p. 12-21.

**Figure S1:** Sequence alignment of selected *Nicotiana* and *Arabidopsis* defensins

```

A  NbD2      KYCWKKNHKWHGPPCHYSYKCNHHCKHYFGAEYGVCKKYQWGHKHHHWAKYACYCYSPC His 10
   NbD1      KYCWKKSHKWHGPPCHYSYKCSHHCKHYFGAEYGICKKYQWGHKHHHWAKYACYCYSPC His 10
   NbD3      KYCWKKSHKWHGPPCHYSYKCSHHCKQYFGAEYGICKKYQWGHKHHHWAKYACYCYSPC His  9
           *****.*****.*****:*****:*****
B  AtD90      HCDHFLGEAPV-YPCKEKACKSVCKEHYHHACKGECEYHGREV-----HCHC His  8
   AtD212     NCDTYLGEVTVYYPCRERDCEAQCYEHYPHSCCKGECEHHDHVVHHDNEEEHCHC His  9
           :*:***. * *:*: *: * * * *:*****:*. : *      *****

```

(A) Sequence alignment of the three HRDs initially identified from *Nicotiana benthamiana*.

(B) HRDs subsequently identified from *Arabidopsis thaliana*. Identical residues are indicated by an asterisk, similar residues are indicated by a full stop under the relevant column. Sequence alignments were performed using Clustal Omega (<https://www.ebi.ac.uk/Tools/msa/clustalo/>).

**Figure S2:** Graphical alignment overview to highlight cysteine and histidine residue distributions for Solanaceae and Brassicaceae histidine-rich defensins (HRDs).

Cysteines are indicated in yellow, histidines in blue, all other residues shown in grey. HRDs in the Solanaceae cluster (A) and the Brassicaceae cluster(B), and those that sit outside of those clusters (C) have differing cysteine residue organisation and distributions of histidine residues.

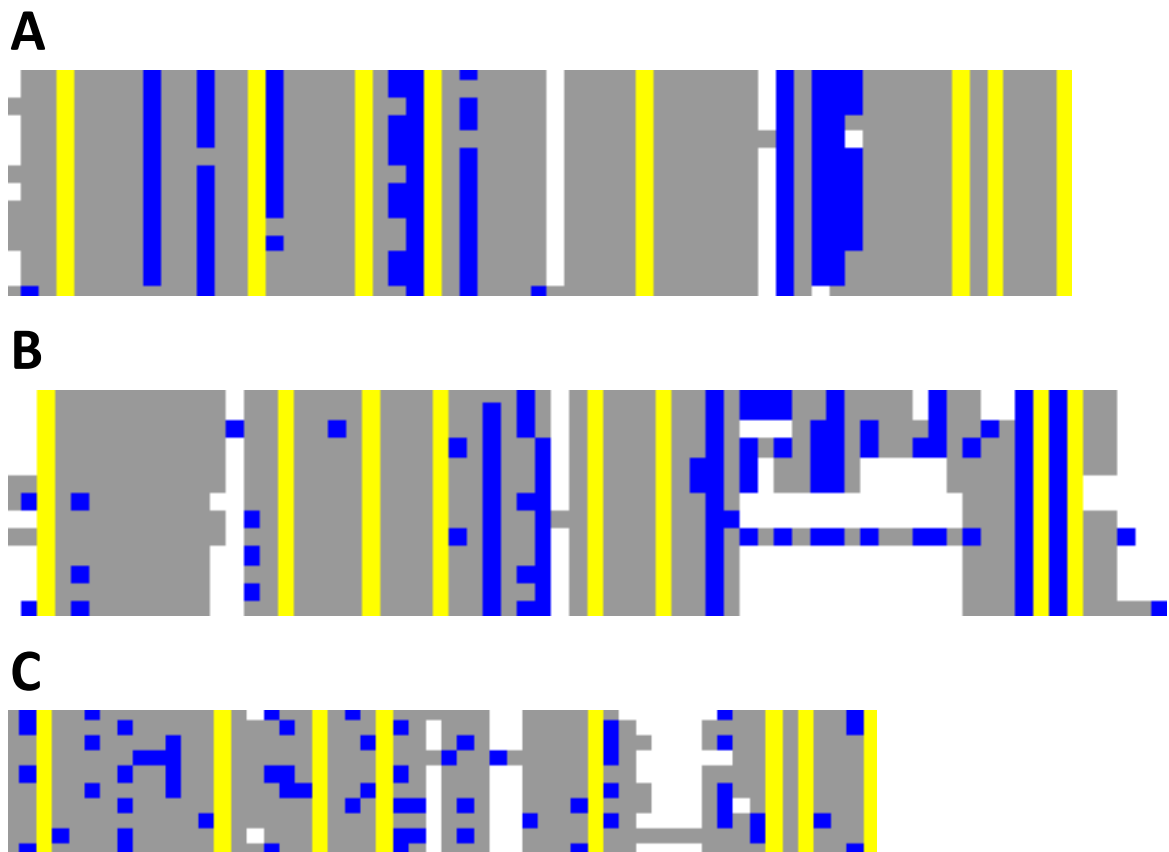

**Figure S3:** Tissue-specific gene expression of selected HRDs.

Transcriptome data was collected from public databases for three selected histidine rich defensins. Relative expression levels are drawn as coloured tissues, from white (no detected expression) to red (maximum expression), representing percentage expression for that gene. NbD2 tissues are (clockwise from top right position) flower, capsule, leaf, seedling, roots, main stem and apex. For AtD90 and AtD212, tissues are labelled on the diagram, shoot apical meristem is abbreviated as SAM.

Gene expression tissue map graphics were downloaded from the *Nicotiana benthamiana* Genome and Transcriptome sequencing consortium browser (NbD2 gene, aka transcript 'Nbv6.1trP18806')) and from the Tair *Arabidopsis thaliana* genome database (AtD90 'AT3G5727' and AtD212 'AT3G05730' genes). The *Arabidopsis* gene expression data was generated by Klepikova et al (2016), while the version 5 *Nicotiana benthamiana* transcriptome data was generated by Nakasugi et al (2014).

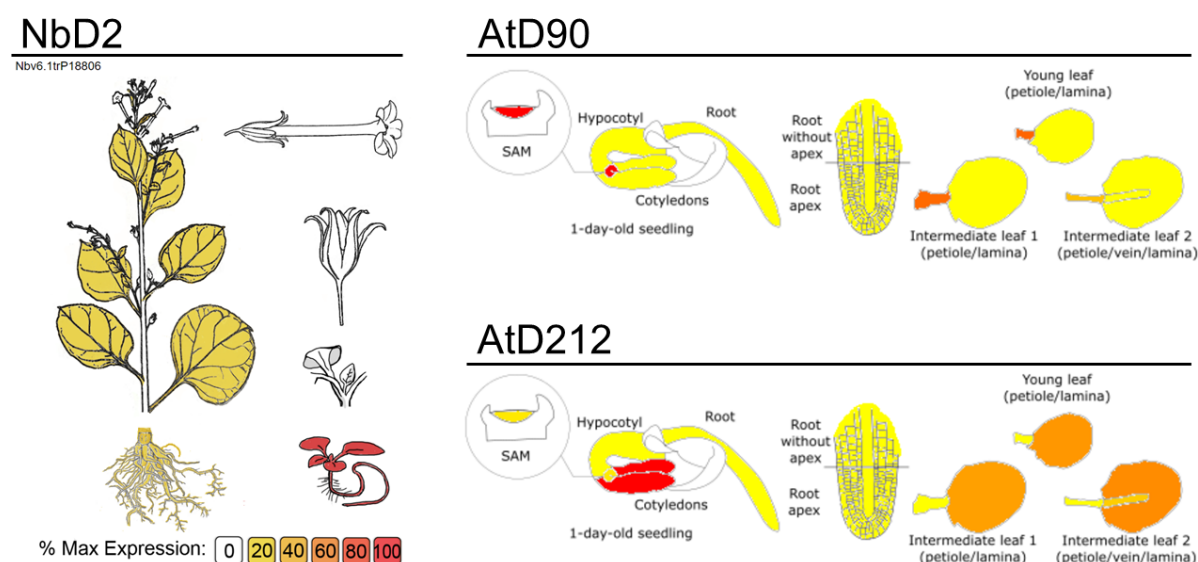

**The Arabidopsis Information Resource (TAIR).**

<https://www.arabidopsis.org/servlets/TairObject?id=35604&type=locus>

Klepikova et al (2016) Plant J. 88 1058-1070

**Nicotiana benthamiana Genome and Transcriptome sequencing consortium**

<https://benthgenome.qut.edu.au/>

Nakasugi K, Crowhurst R, Bally J, Waterhouse P (2014) Combining Transcriptome Assemblies from Multiple *De Novo* Assemblers in the Allo-Tetraploid Plant *Nicotiana benthamiana*. PLoS ONE 9(3): e91776.

<https://doi.org/10.1371/journal.pone.0091776>

**Figure S4** Antifungal activity of HRDs against *C. albicans* and *F. graminearum*

(A) *C. albicans* and (B) *F. graminearum* were grown in the presence of HRDs as well as the well characterised defensin NaD1. Growth was assessed by reading the absorbance at 595 nm and presented relative to the untreated control. Data is representative of three independent experiments. Error bars are standard deviation of three technical replicates.

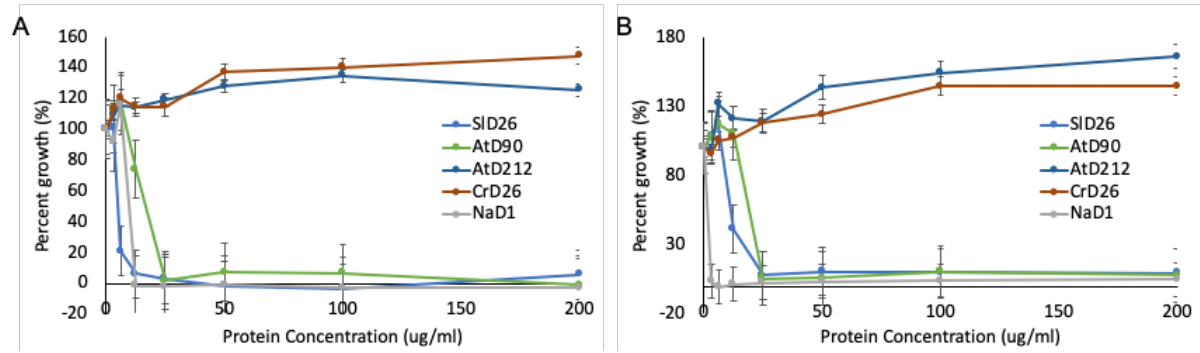

**Figure S5:** Overlay of the 20 lowest-energy state structures for **A)** SID26 and **B)** AtD90 with disulphides in yellow, histidines in blue (with their nitrogen atoms in dark blue).

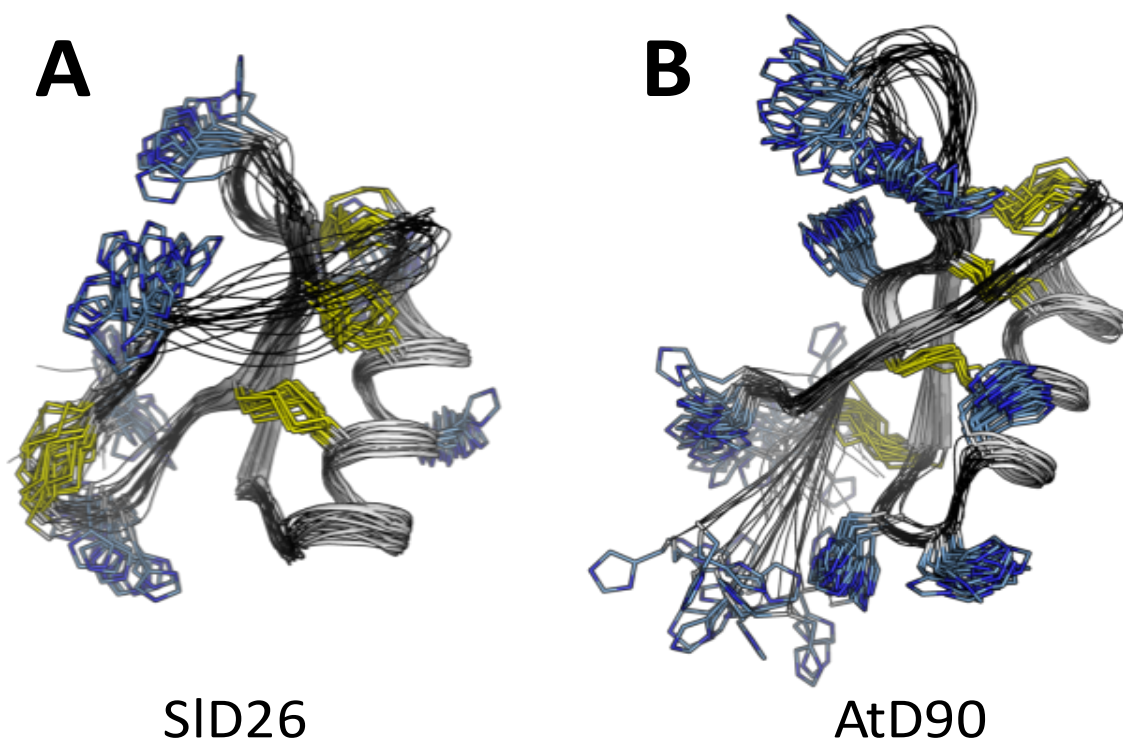

Supplement: s1 [file s1]
